# Supplementary material for: SMN-deficient cells exhibit increased ribosomal DNA damage
Source: PubMed Central journal article supplement (PMC9018017; doi:10.26508/lsa.202101145), 2022-04-19

# Source Data for Fig 4A

## RNA pol II

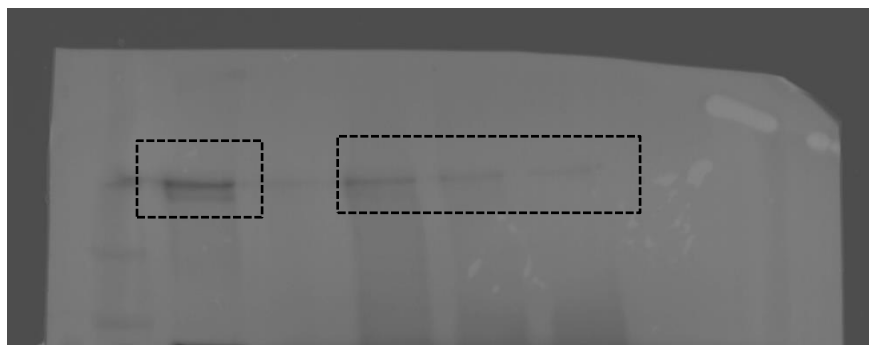

## RNA pol I

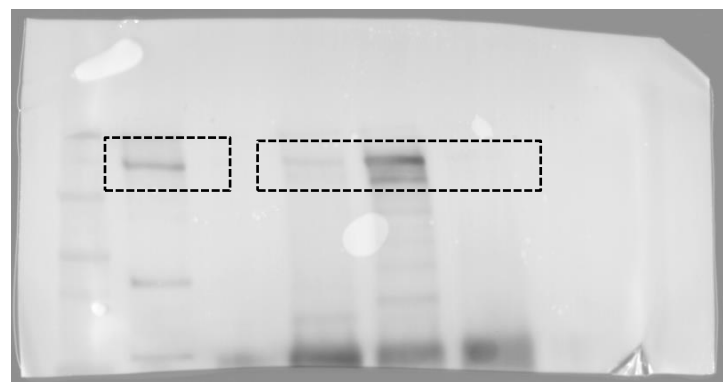

## SETX

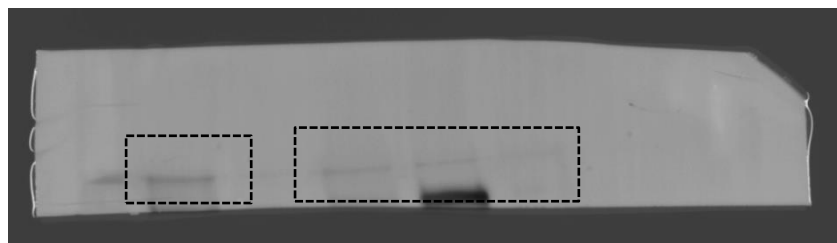

## TOPO I

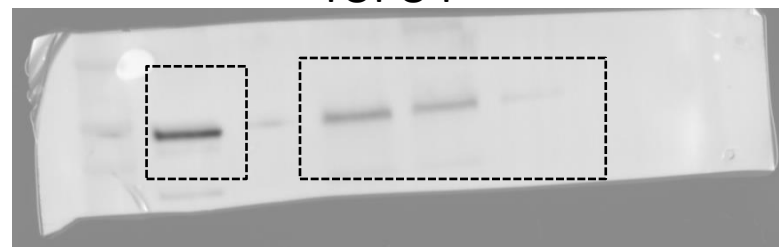

## SMN

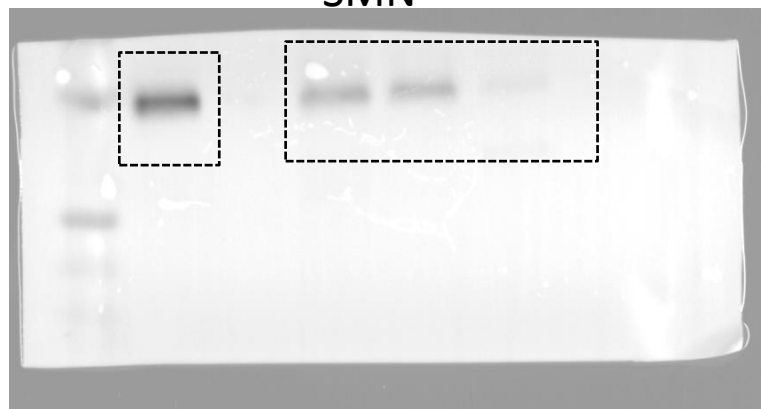

Source Data for Fig 4B

RNA pol I

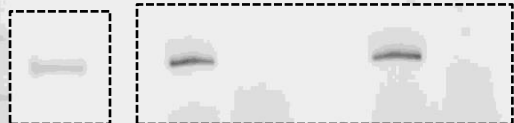

TOPO I

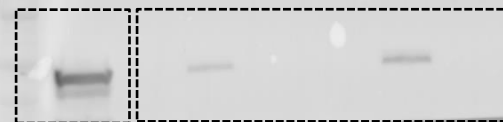

Senataxin

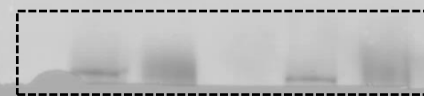

SMN

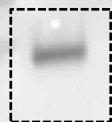

SMN

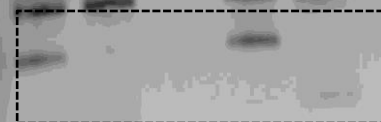

SSRP1

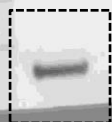

SSRP1

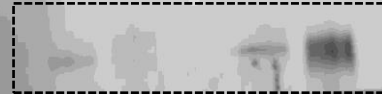

Source Data for Fig 4E

RNA pol II

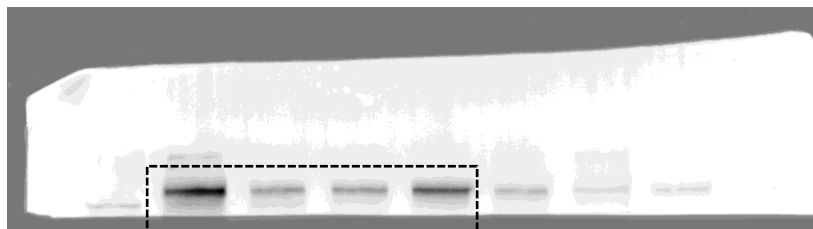

RNA pol I

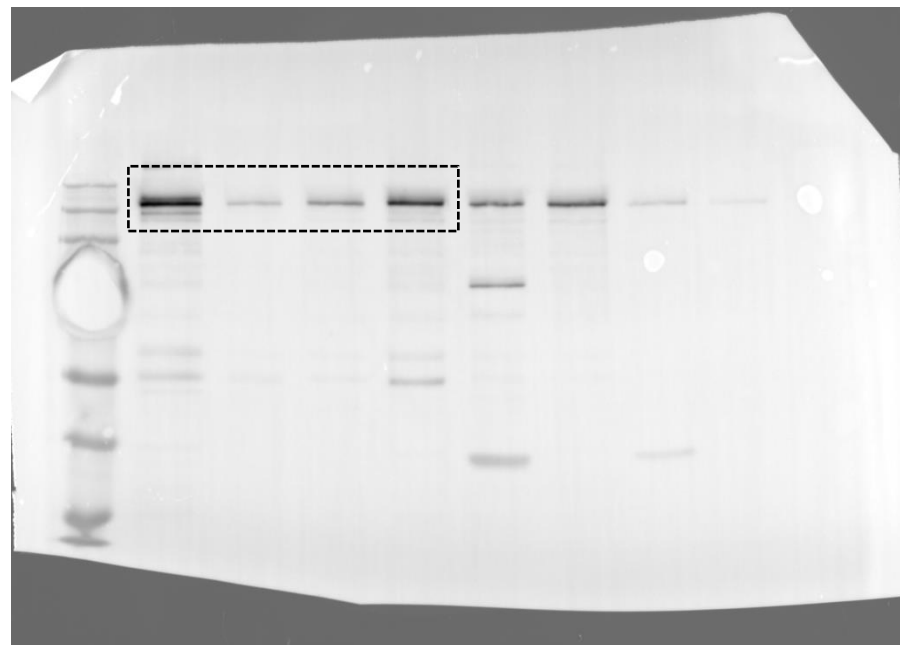

GFP

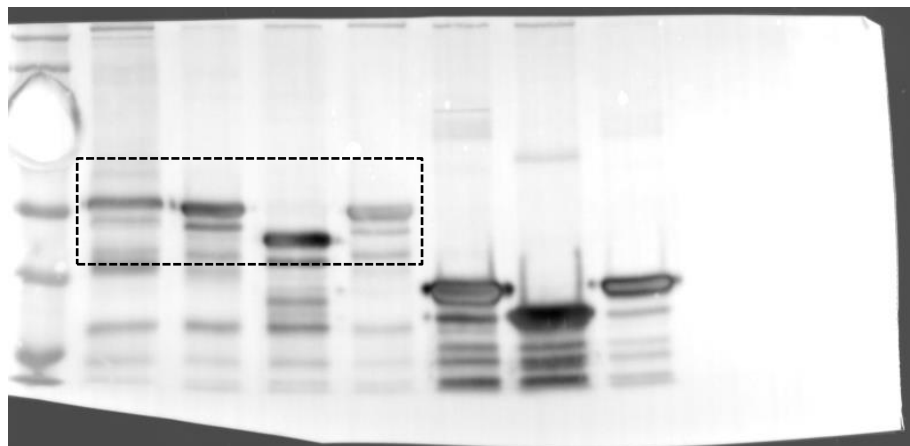

Supplement: LSA-2021-01145_SdataF4.pdf [file LSA-2021-01145_SdataF4.pdf]
