# Supplementary material for: SMN-deficient cells exhibit increased ribosomal DNA damage
Source: PubMed Central journal article supplement (PMC9018017; doi:10.26508/lsa.202101145), 2022-04-19

Source Data for Fig S6B

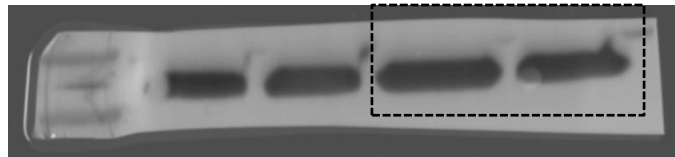

$\alpha$ -tubulin

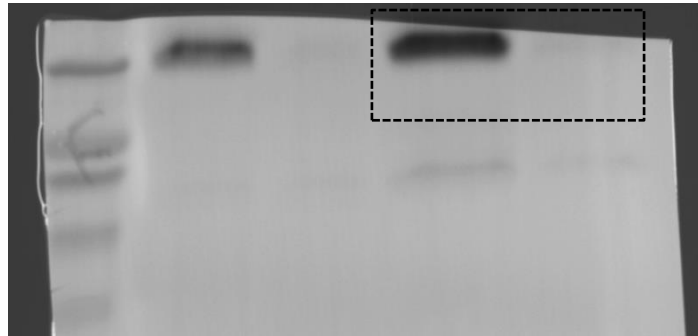

SMN

Source Data for Fig S6D

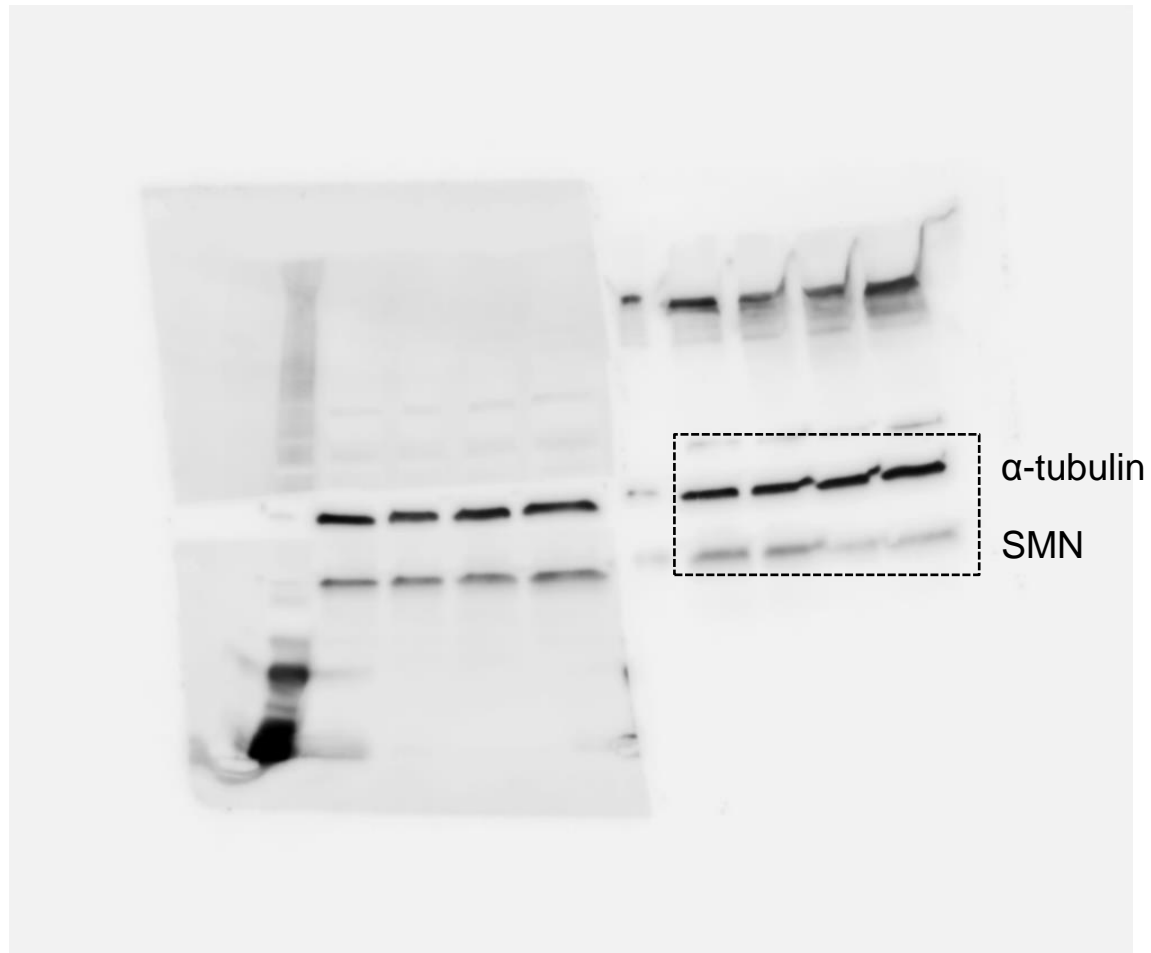

Supplement: LSA-2021-01145_SdataFS6.pdf [file LSA-2021-01145_SdataFS6.pdf]
