# Supplementary material for: SMN-deficient cells exhibit increased ribosomal DNA damage
Source: PubMed Central journal article supplement (PMC9018017; doi:10.26508/lsa.202101145), 2022-04-19
Supplement: LSA-2021-01145_SdataFS9.pdf [file LSA-2021-01145_SdataFS9.pdf]

# Source Data for Fig S9

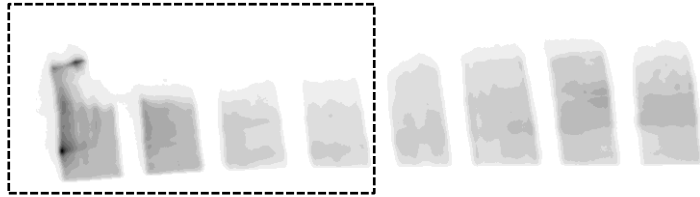

RNA pol II

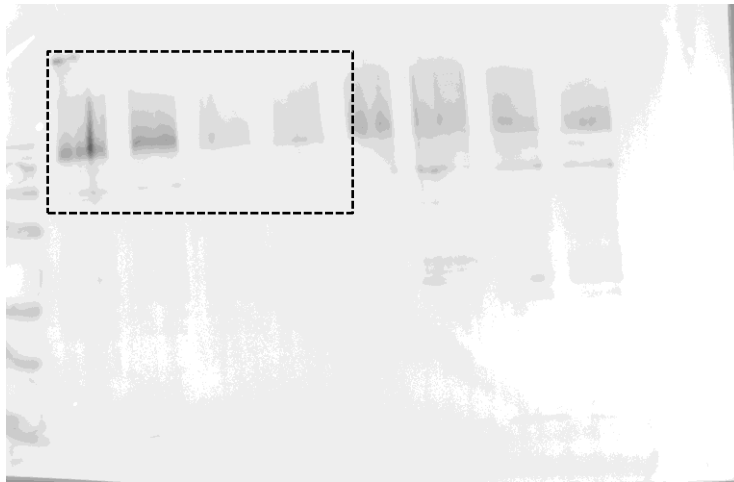

RNA pol I

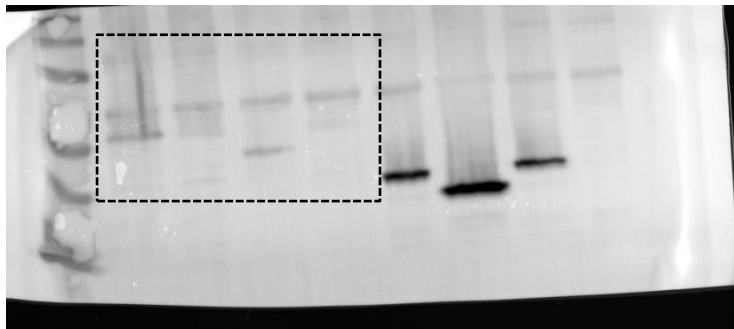

GFP
